# Supplementary material for: Cacao Pod Husk Flour as an Ingredient for Reformulating Frankfurters: Effects on Quality Properties
Source: MDPI journal article supplement (doi:10.3390/foods10061243), 2021-05-30
Supplement: s1 [file s1]

Table S1. Proximate composition (g/100 g dry sample) of frankfurters.

|                               | Frankfurters   |                 |                |                | Sig. |
|-------------------------------|----------------|-----------------|----------------|----------------|------|
|                               | Control        | CPHF 1.5        | CPHF 3.0       | CPHF-PS 1.5    |      |
| Protein (g/100 g)             | 27.45 ± 0.83 a | 32.32 ± 0.66 ab | 35.82 ± 1.31 b | 34.59 ± 0.41 b | *    |
| Lipid (g/100 g)               | 52.30 ± 0.24 c | 48.67 ± 0.98 b  | 40.25 ± 0.21 a | 49.83 ± 2.89 b | **   |
| Total dietary Fiber (g/100 g) | 0.13 ± 0.36 a  | 1.15 ± 0.17 b   | 2.40 ± 0.41 c  | 1.29 ± 0.19 b  | *    |
| Carbohydrates (g/100 g)       | 13.7 ± 0.9 c   | 11.28 ± 0.86 b  | 14.5 ± 1.3 c   | 7.72 ± 2.8 a   | *    |
| Ash (g/100 g)                 | 6.23 ± 0.06 b  | 6.46 ± 0.39 ab  | 7.00 ± 0.02 b  | 6.40 ± 0.19 a  | *    |

Results are expressed as means of three samples ± standard deviations. Different letters in the same row indicate significant differences (LSD test,  $p < 0.05$ ). Asterisks indicate significance at \* $p < 0.05$ ; \*\* $p < 0.01$ ; n.s. not significant. CPHF Dp < 200 µm.
